# Supplementary material for: Inorganic Nanoparticles: Tools to Emphasize the Janus Face of Amphotericin B
Source: MDPI journal article supplement (doi:10.3390/antibiotics12101543), 2023-10-15
Supplement: s1 [file s1]

## Supplementary data S1

| Reference                                                                                                 | Formulations |             |                                    | Drugs |        | Overview of            |                                |
|-----------------------------------------------------------------------------------------------------------|--------------|-------------|------------------------------------|-------|--------|------------------------|--------------------------------|
|                                                                                                           | Liposomes    | Lipid-based | Other nanoparticles or assimilated | AmB   | Others | Products on the market | Products under clinical trials |
| Hafner et al., 2014.                                                                                      | x            | x           | x                                  | x     | x      | x                      |                                |
| Discussion on nanosimilars, problems about the regulatory issues and the translation from bench to market |              |             |                                    |       |        |                        |                                |
| Bekersky et al., 1999.                                                                                    | x            | x           |                                    | x     |        |                        |                                |
| Focus on the clinical data of AmB formulations                                                            |              |             |                                    |       |        |                        |                                |
| Allen and Cullis, 2013.                                                                                   | x            |             |                                    | x     | x      | x                      | x                              |
| Discussion on PEGylated liposomes, triggered release liposomes, targeted liposomes                        |              |             |                                    |       |        |                        |                                |
| Bobo et al., 2016.                                                                                        | x            |             | x                                  | x     | x      | x                      | x                              |
| Chronologic overview of the market                                                                        |              |             |                                    |       |        |                        |                                |

|                                                                                                                                         |   |   |   |   |   |   |   |
|-----------------------------------------------------------------------------------------------------------------------------------------|---|---|---|---|---|---|---|
| Anselmo and Mitragotri, 2016.                                                                                                           | x |   | x | x | x | x | x |
| Anselmo and Mitragotri, 2019.                                                                                                           |   |   |   |   |   |   |   |
| Discussion on translation challenges (difference between human and animal models, biodistribution, scale-up, nanoparticle optimization) |   |   |   |   |   |   |   |
| Weissig et al., 2014.                                                                                                                   | x | x | x | x | x | x |   |
| Discussion on pharmacoeconomy and clinical data on AmB formulations                                                                     |   |   |   |   |   |   |   |
| Voltan et al., 2016.                                                                                                                    | x | x | x | x | x |   |   |
| Only focus on antifungals, on targeted microorganisms and related indications and products under pre-clinical development               |   |   |   |   |   |   |   |
| Sosnik and Carcaboso, 2014.                                                                                                             | x |   | x | x | x | x | x |
| Only focus on pediatric diseases, and mainly on cancer                                                                                  |   |   |   |   |   |   |   |
| Fernandez-Garcia et al., 2017.                                                                                                          | x | x | x | x | x | x | x |
| Emphasize on the type of drug delivery system and the effect of particle size on efficacy, toxicity and biodistribution                 |   |   |   |   |   |   |   |

---

## References

Hafner A., Lovrić J., Lakoš G.P., Pepić I. Nanotherapeutics in the EU: an overview on current state and future directions. *Int J Nanomedicine* 2014;9:1005–23. <https://doi.org/10.2147/IJN.S55359>.

Bekersky I., Fielding R.M., Buell D., Lawrence I. Lipid-based amphotericin B formulations: from animals to man. *Pharm Sci Technol Today* 1999;2:230–6. [https://doi.org/10.1016/s1461-5347\(99\)00160-1](https://doi.org/10.1016/s1461-5347(99)00160-1).

Allen T.M., Cullis P.R. Liposomal drug delivery systems: from concept to clinical applications. *Adv Drug Deliv Rev* 2013;65:36–48. <https://doi.org/10.1016/j.addr.2012.09.037>.

Bobo D., Robinson K.J., Islam J., Thurecht K.J., Corrie S.R. Nanoparticle-Based Medicines: A Review of FDA-Approved Materials and Clinical Trials to Date. *Pharm Res* 2016;33:2373–87. <https://doi.org/10.1007/s11095-016-1958-5>.

Anselmo A.C., Mitragotri S. Nanoparticles in the clinic: An update. *Bioeng Transl Med* 2019;4:e10143. <https://doi.org/10.1002/btm2.10143>.

Anselmo A.C., Mitragotri S. Nanoparticles in the clinic. *Bioeng Transl Med* 2016;1:10–29. <https://doi.org/10.1002/btm2.10003>.

Weissig V., Pettinger T.K., Murdock N. Nanopharmaceuticals (part 1): products on the market. *Int J Nanomedicine* 2014;9:4357–73. <https://doi.org/10.2147/IJN.S46900>.

Voltan A.R., Quindós G., Alarcón K.P.M., Fusco-Almeida A.M., Mendes-Giannini M.J.S., Chorilli M. Fungal diseases: could nanostructured drug delivery systems be a novel paradigm for therapy? *Int J Nanomedicine* 2016;11:3715–30. <https://doi.org/10.2147/IJN.S93105>.

Sosnik A., Carcaboso A.M. Nanomedicines in the future of pediatric therapy. *Adv Drug Deliv Rev* 2014;73:140–61. <https://doi.org/10.1016/j.addr.2014.05.004>.

Fernandez-Garcia R., de Pablo E., Ballesteros M.P., Serrano D.R. Unmet clinical needs in the treatment of systemic fungal infections: The role of amphotericin B and drug targeting. *Int J Pharm* 2017;525:139–48. <https://doi.org/10.1016/j.ijpharm.2017.04.013>.
